# Supplementary material
Source: PubMed Central journal article supplement (PMC3257956)
Supplement: mmc1.pdf [file mmc1.pdf]

**The American Journal of Human Genetics, Volume 90  
Supplemental Data**

## **Mutations in *EZH2* Cause Weaver Syndrome**

**William T. Gibson, Rebecca L. Hood, Shing Hei Zhan, Dennis E. Bulman, Anthony P Fejes, Richard Moore, Andrew J. Mungall, Patrice Eydoux, Riyana Babul-Hirji, Jianghong An, Marco A. Marra, FORGE Canada Consortium, David Chitayat, Kym M. Boycott, David D. Weaver, and Steven J.M. Jones**

A

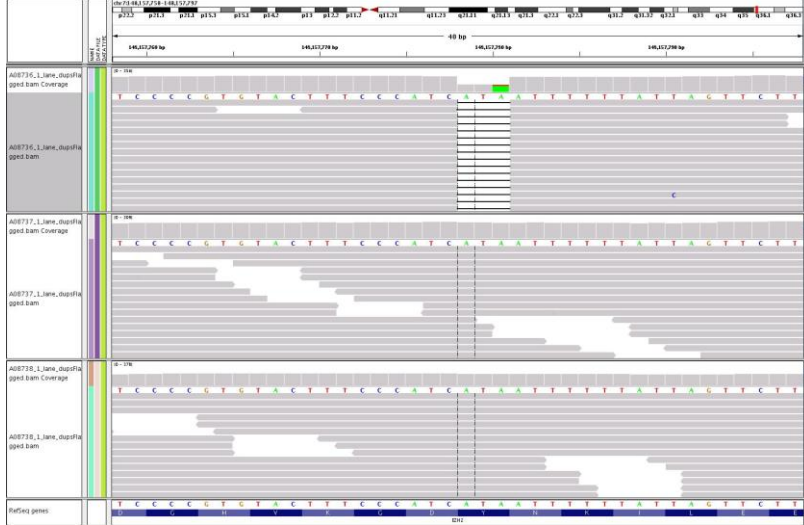

B

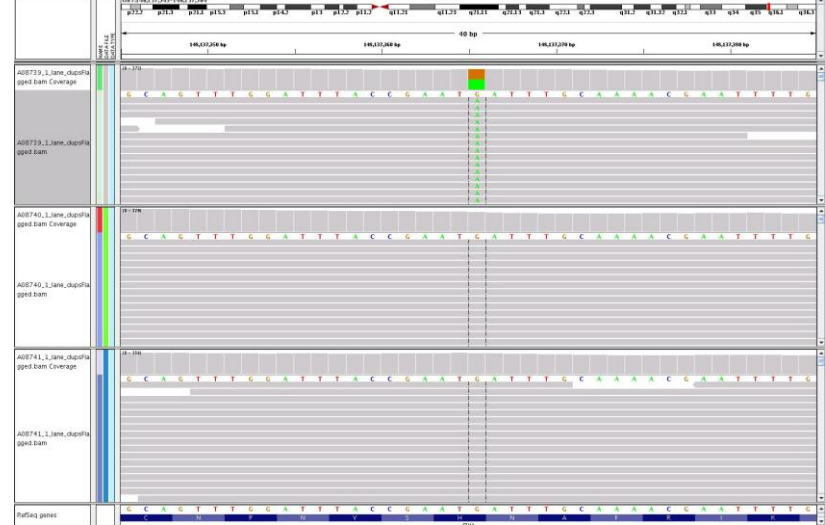

Figure S1. Integrative Genomics Viewer<sup>1</sup>-Generated Images of BAM File Read Alignments to hg18 for Proband 1 and 2 and Their Parents

(A) *EZH2* mutation c.457\_459del (p.Tyr153del) in Proband 1 (top), his mother (middle) and father (bottom).

(B) *EZH2* mutation c.2080C>T (p.His694Tyr) in Proband 2 (top), her mother (middle) and father (bottom).

**Table S1.** Summary Statistics of Exome Resequencing

| Subject                                          | Proband 1<br>(A08736)         | Mother 1<br>(A08737) | Father 1<br>(A08738) | Proband 2<br>(A08739)      | Mother 2<br>(A08740) | Father 2<br>(A08741) |
|--------------------------------------------------|-------------------------------|----------------------|----------------------|----------------------------|----------------------|----------------------|
| Total sequence yield (Gb) <sup>a</sup>           | 1.86                          | 1.97                 | 2.02                 | 2.08                       | 1.90                 | 1.98                 |
| Total reads                                      | 429,667,422                   | 424,496,474          | 463,366,406          | 506,490,420                | 463,258,182          | 409,296,116          |
| Chastity-passed reads                            | 348,012,586                   | 386,608,086          | 414,972,084          | 441,242,928                | 415,420,736          | 372,566,906          |
| Reads aligned to hg18                            | 343,664,632                   | 382,044,390          | 409,662,802          | 435,193,786                | 410,538,142          | 368,077,609          |
| Reads aligned with mapping quality $\geq 10$     | 314,597,518                   | 350,236,460          | 374,396,369          | 400,054,154                | 376,045,604          | 336,881,973          |
| Reads used for variant calling <sup>b</sup>      | 143,593,996                   | 141,579,235          | 187,165,231          | 202,315,301                | 176,426,879          | 182,790,043          |
| Mean exome coverage <sup>c</sup>                 | 213                           | 236                  | 253                  | 274                        | 260                  | 228                  |
| Total exonic variants <sup>d</sup>               | 24,287                        | 24,396               | 25,207               | 25,127                     | 24,914               | 24,688               |
| Exonic synonymous SNVs                           | 11,355                        | 11,420               | 11,777               | 11,782                     | 11,704               | 11,676               |
| Exonic non-synonymous (ns) variants <sup>e</sup> | 12,932                        | 12,976               | 13,430               | 13,345                     | 13,210               | 13,012               |
| nsSNVs                                           | 11,091                        | 11,079               | 11,396               | 11,306                     | 11,207               | 11,081               |
| Splice-site SNVs [also nsSNVs]                   | 889 [273]                     | 905 [265]            | 964 [274]            | 985 [288]                  | 935 [276]            | 912 [267]            |
| Insertions/deletions <sup>f</sup>                | 585/640                       | 583/674              | 636/708              | 637/705                    | 618/726              | 602/684              |
| ns variants not in dbSNP129/130                  | 2,885                         | 2,839                | 3,173                | 3,093                      | 3,046                | 2,977                |
| Novel ns variants <sup>g</sup>                   | 2 (17)                        | 117                  | 196                  | 2 (16)                     | 148                  | 113                  |
| Rare variants in compound heterozygous state     | None                          | Not Analyzed         | Not Analyzed         | None                       | Not Analyzed         | Not Analyzed         |
| <i>de novo</i> candidate variants                | c.457_459del<br>(p.Tyr153del) | None                 | None                 | c.2080C>T<br>(p.His694Tyr) | None                 | None                 |

<sup>a</sup> – span of the human genome (hg18) covered by  $\geq 1$  read aligned with Phred-scaled mapping quality of  $\geq 10$

<sup>b</sup> – reads having Phred-scaled mapping quality of  $\geq 10$  and after duplicates are removed

<sup>c</sup> – average read depth of exons annotated in Ensembl 54; (sum of the number of reads aligned per site for all exonic sites) / (total number of exonic sites)

<sup>d</sup> – variants as output from [samtools.pl varFilter -D 1000 | awk '\$6>=20'], excluding those in 5'UTR, 3'UTR, introns, and intergenic regions

<sup>e</sup> – variants include nsSNVs, splice-site SNVs within 2bp of exon boundaries, and small indels

<sup>f</sup> – coding region insertions/deletions supported by  $\geq 6$  aligned reads

<sup>g</sup> – not previously reported in dbSNP129/130, 1000 Genomes Project, or other non-cancer genomes collected in the Genome Sciences Centre local database. For probands, the total of “novel” variants excludes those seen in their unaffected parents and represents *de novo* variants. Numbers in parentheses include apparently *de novo* variants seen at low coverage (i.e. fewer than 100 reads per variant).

**Supplementary References**

1. Robinson, J.T., Thorvaldsdóttir, H., Winckler, W., Guttman, M., Lander, E.S., Getz, G., and Mesirov, J.P. (2011). Integrative Genomics Viewer. *Nat Biotechnology* 29, 24–26. URL: <http://www.broadinstitute.org/igv/>
